# Supplementary material for: Exploring the Risk Posed by Animals with an Inconclusive Reaction to the Bovine Tuberculosis Skin Test in England and Wales
Source: MDPI journal article supplement (doi:10.3390/vetsci6040097), 2019-11-30
Supplement: s1 [file s1]

# Supplementary Information

Exploring the risk posed by animals with an inconclusive reaction to the bovine tuberculosis skin test in England and Wales

Elizabeth May, Alison Prosser, Sara H. Downs and Lucy A. Brunton

Influential points were examined using the leverage (hat diagonal) plotted against the predicted probabilities. The 5% of observations with the greatest leverage were excluded and the mixed effects models re-run to see if the estimates differed.

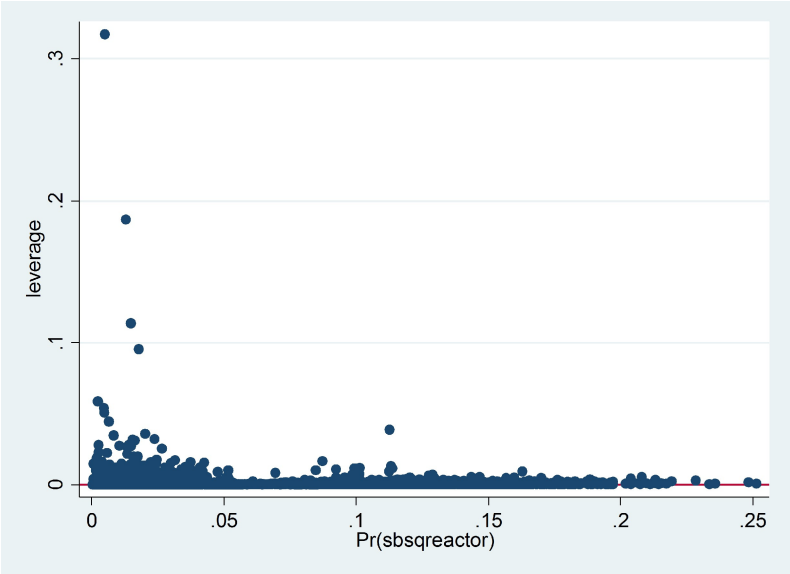

Figure S1. Plot of leverage against predicted probabilities for full model.

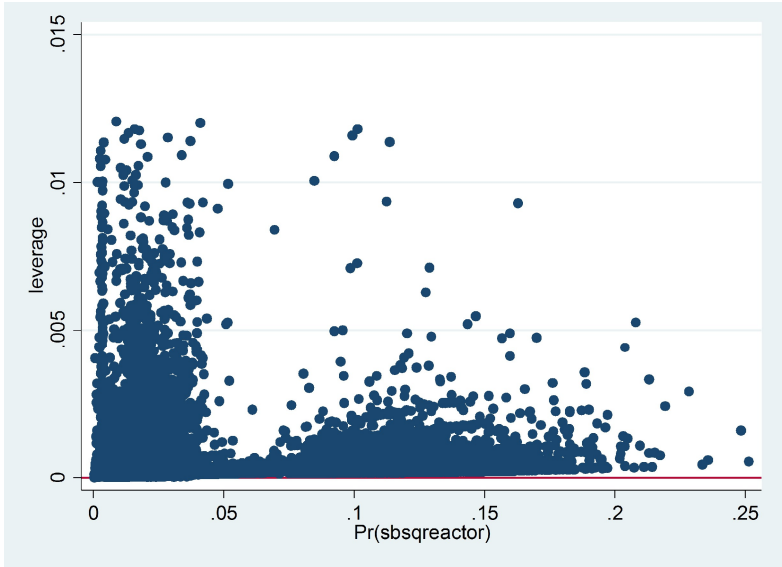

Figure S2. Plot of leverage against predicted probabilities for full model, with 5% of observations with greatest leverage excluded.

**Table S1. Model outputs with 5% of observations with greatest leverage excluded.**

**England**

| Variable                                    |                | OR    | [95%<br>Conf. | Interval] | P value |
|---------------------------------------------|----------------|-------|---------------|-----------|---------|
| Status at first WHT in 2012                 | Negative       | 1.00  |               |           |         |
|                                             | IR             | 21.70 | 10.14         | 46.45     | <0.001  |
| Risk area                                   | LRA            | 1.00  |               |           |         |
|                                             | Edge           | 5.69  | 3.20          | 10.14     | <0.001  |
|                                             | HRA            | 13.00 | 7.64          | 22.14     | <0.001  |
| First test classification                   | No lesion      | 1.00  |               |           |         |
|                                             | No oedema      | 1.05  | 0.93          | 1.18      | 0.450   |
|                                             | Some oedema    | 1.16  | 0.94          | 1.43      | 0.157   |
|                                             | Circumscribed  | 1.20  | 1.09          | 1.31      | <0.001  |
| Sex                                         | Male           | 1.00  |               |           |         |
|                                             | Female         | 2.24  | 2.06          | 2.45      | <0.001  |
| Herd breakdowns in the last 10 years        |                | 1.14  | 1.08          | 1.19      | <0.001  |
| Interaction between IR status and risk area |                |       |               |           |         |
|                                             | England -LRA   | 1.00  |               |           |         |
|                                             | England - Edge | 0.34  | 0.15          | 0.80      | 0.013   |
|                                             | England - HRA  | 0.31  | 0.14          | 0.67      | 0.003   |

**HRA**

| Variable                                  |               | OR   | [95%<br>Conf. | Interval] | P value |
|-------------------------------------------|---------------|------|---------------|-----------|---------|
| Status at first WHT in 2012               | Negative      | 1.00 |               |           |         |
|                                           | IR            | 6.78 | 5.91          | 7.77      | <0.001  |
| First test classification                 | No lesion     | 1.00 |               |           |         |
|                                           | No oedema     | 1.03 | 0.91          | 1.17      | 0.638   |
|                                           | Some oedema   | 1.14 | 0.92          | 1.41      | 0.217   |
|                                           | Circumscribed | 1.18 | 1.07          | 1.30      | 0.001   |
| Sex                                       | Male          | 1.00 |               |           |         |
|                                           | Female        | 2.24 | 2.05          | 2.45      | <0.001  |
| Herd breakdowns in the last 10 years      |               | 1.15 | 1.10          | 1.21      | <0.001  |
| Number of cattle in herd (per 100 cattle) |               | 0.94 | 0.91          | 0.98      | 0.001   |

**Edge**

| Variable                    |          | OR   | [95%<br>Conf. | Interval] | P value |
|-----------------------------|----------|------|---------------|-----------|---------|
| Status at first WHT in 2012 | Negative | 1.00 |               |           |         |
|                             | IR       | 8.75 | 5.89          | 12.99     | <0.001  |
| Sex                         | Male     | 1.00 |               |           |         |
|                             | Female   | 2.86 | 1.78          | 4.58      | <0.001  |

**LRA**

| <b>Variable</b>             |          | <b>OR</b> | <b>[95%<br/>Conf.</b> | <b>Interval]</b> | <b>P value</b> |
|-----------------------------|----------|-----------|-----------------------|------------------|----------------|
| Status at first WHT in 2012 | Negative | 1.00      |                       |                  |                |
|                             | IR       | 28.53     | 12.89                 | 63.11            | <0.001         |

**Wales**

| <b>Variable</b>                      |          | <b>OR</b> | <b>[95%<br/>Conf.</b> | <b>Interval]</b> | <b>P&gt;z</b> |
|--------------------------------------|----------|-----------|-----------------------|------------------|---------------|
| Status at first WHT in 2012          | Negative | 1.00      |                       |                  |               |
|                                      | IR       | 6.93      | 5.79                  | 8.30             | <0.001        |
| Sex                                  | Male     | 1.00      |                       |                  |               |
|                                      | Female   | 2.36      | 1.98                  | 2.80             | <0.001        |
| IR result previous to 2012 WHT       | No       | 1.00      |                       |                  |               |
|                                      | Yes      | 0.57      | 0.45                  | 0.74             | <0.001        |
| Herd type                            | Beef     | 1.00      |                       |                  |               |
|                                      | Dairy    | 1.57      | 1.19                  | 2.07             | 0.001         |
|                                      | Other    | 1.00      |                       |                  |               |
| Herd breakdowns in the last 10 years |          | 1.34      | 1.22                  | 1.47             | <0.001        |
